# Supplementary material for: Integrated analysis of mRNAs and long noncoding RNAs in the semen from Holstein bulls with high and low sperm motility
Source: PubMed Central journal article supplement (PMC6376035; doi:10.1038/s41598-018-38462-x), 2019-02-14

## Supplementary Information

### **Integrated analysis of mRNAs and long noncoding RNAs in the semen from Holstein bulls with high and low sperm motility**

Xiuge Wang<sup>1,#</sup>, Chunhong Yang<sup>1,#</sup>, Fang Guo<sup>1</sup>, Yaran Zhang<sup>1</sup>, Zhihua Ju<sup>1</sup>, Qiang Jiang<sup>1</sup>, Xueming Zhao<sup>2</sup>, Yong Liu<sup>1</sup>, Han Zhao<sup>3</sup>, Jinpeng Wang<sup>1</sup>, Yan Sun<sup>1</sup>, Changfa Wang<sup>1</sup>, Huabin Zhu<sup>2</sup>, Jinming Huang<sup>1,3,\*</sup>

Running head: lncRNA affecting bull sperm motility

<sup>1</sup> Dairy Cattle Research Center, Shandong Academy of Agricultural Sciences, No. 159 Gongye North Road, Jinan, 25131, P.R. China.

<sup>2</sup> Embryo Biotechnology and Reproduction Laboratory, Institute of Animal Sciences, Chinese Academy of Agricultural Sciences, Beijing, 100193, P.R. China.

<sup>3</sup> College of Life Sciences, Shandong Normal University, Jinan, 250014, P.R. China.

# These authors equally contributed to the study.

\* Correspondence and requests for materials should be addressed to J.M. Huang.  
(email: huangjinm@sina.com)

**Figure S1. Categories and density distribution of novel assembled lncRNAs.** (A) Distribution of “u”, “o”, “x”, and “j” categories. (B) Density distribution of the “j”, “o”, “u”, and “x” lncRNA categories on the cow chromosome.

**A**

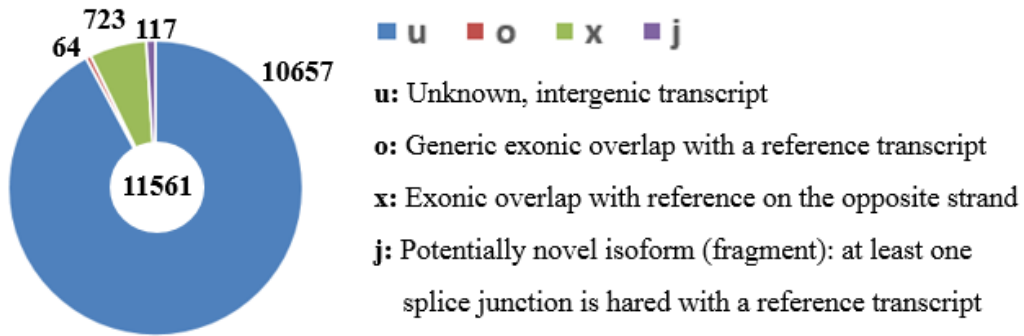

**B**

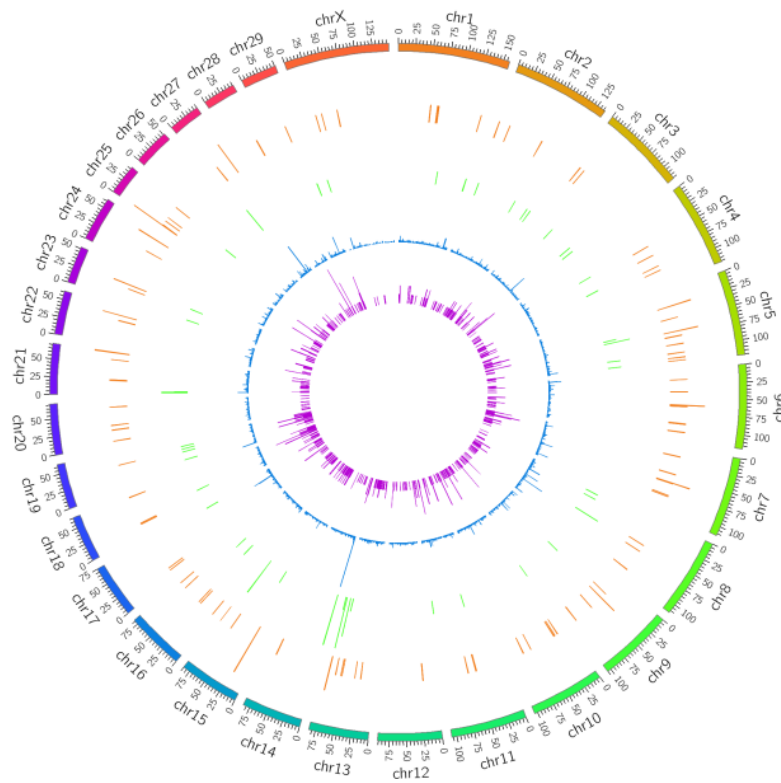

**Figure S2. Expression levels of mRNAs and lncRNAs in the high sperm motility group (H) and low sperm motility group (L). Analysis of differentially expressed mRNAs and lncRNAs.**

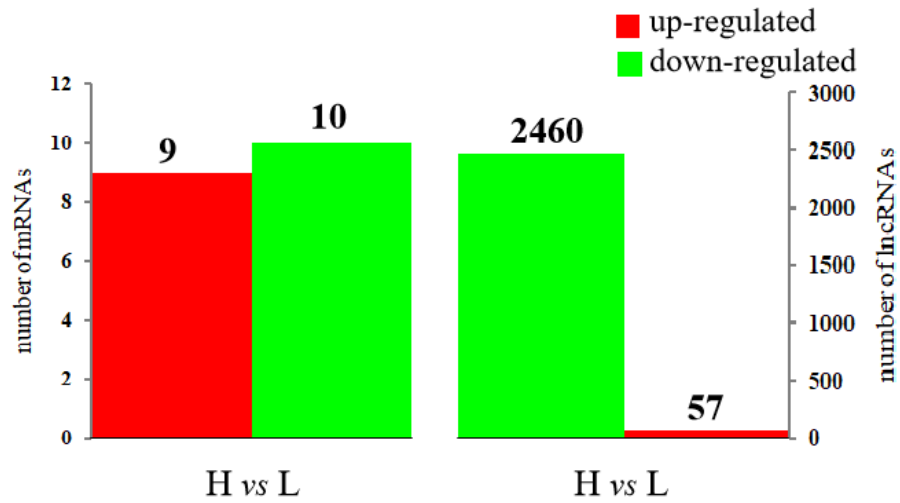

**Figure S3. Verification of RNA-Seq mRNA expression results through qRT-PCR.**

Five mRNA genes expressed in semen were selected for validation. Data are presented as the difference in relative expression between the H and L groups. The expression of each gene was normalized to that of  $\beta$ -actin. Bars represent the mean ( $\pm$  SD) of three experiments.

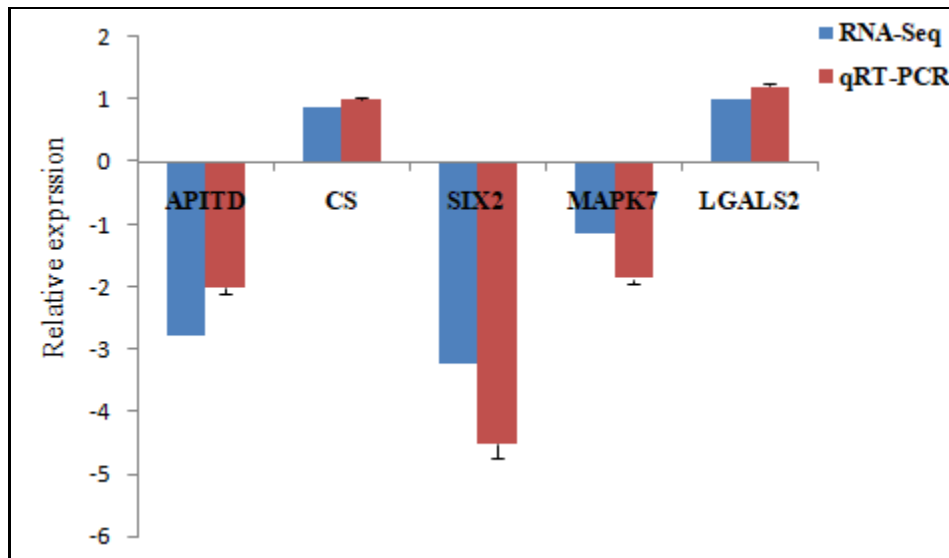

**Figure S4. Chromosomal distribution of differentially expressed coding genes and lncRNAs.** (A) Chromosomal distribution of 281 differentially expressed coding genes. (B) Chromosomal distribution of 2602 differentially expressed lncRNAs.

**A**

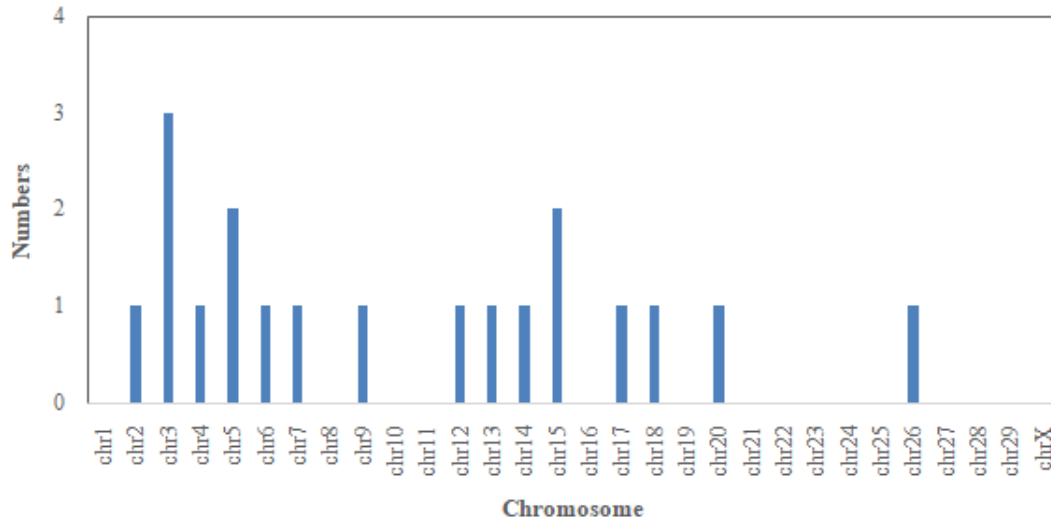

**B**

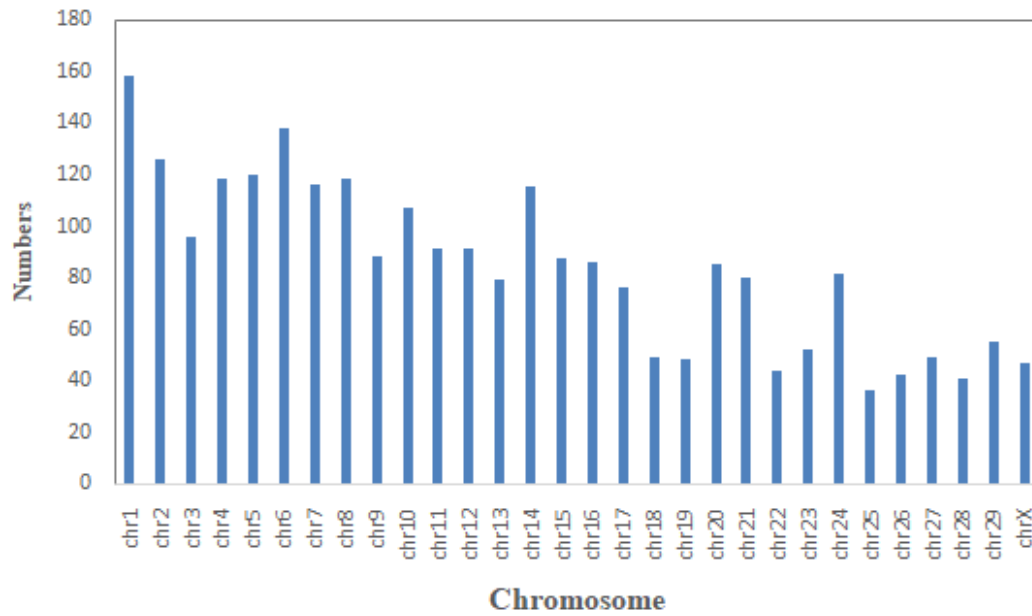

Supplement: 41598_2018_38462_MOESM1_ESM.pdf [file 41598_2018_38462_MOESM1_ESM.pdf]
